# Supplementary material for: Bifidobacterium longumCCFM752 prevented hypertension and aortic lesion, improved antioxidative ability, and regulated the gut microbiome in spontaneously hypertensive rats
Source: Royal Society of Chemistry journal article supplement (doi:10.1039/d1fo04446j), 2022-01-01
Supplement: d1fo04446j1.pdf [file d1fo04446j1.pdf]

## Supplementary Information

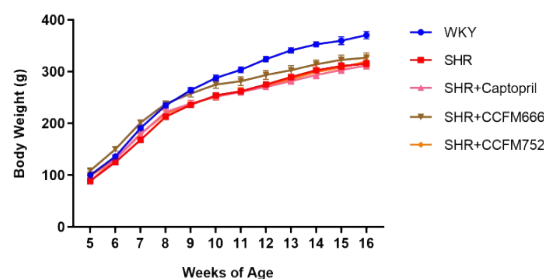

Fig. S1 Body weight of rats in every week.

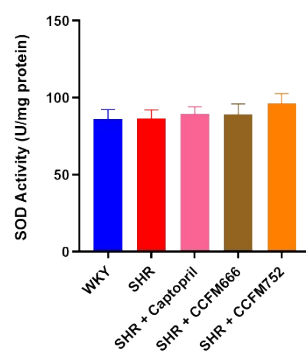

Fig. S2 Rat aortic superoxide dismutase (SOD) activity.

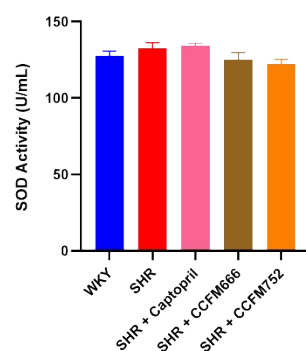

Fig. S3 Rat serum superoxide dismutase (SOD) activity.

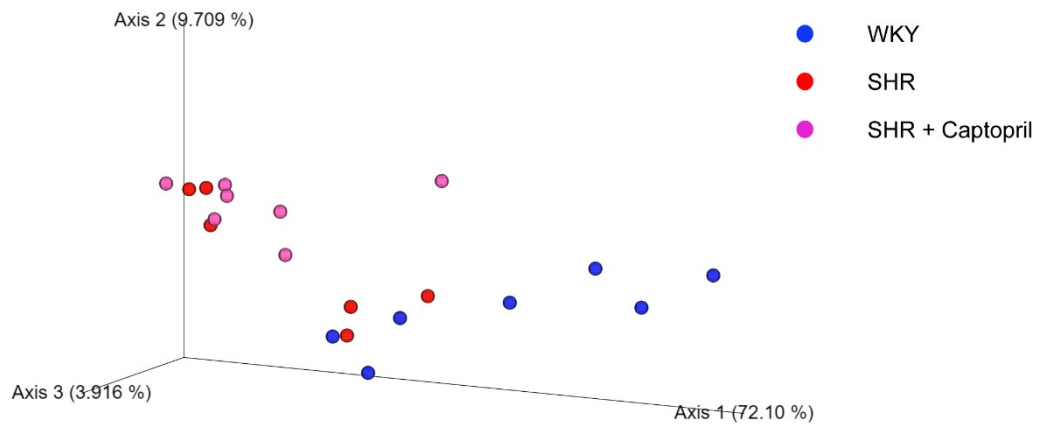

Fig. S4 Principal coordinate analysis of gut flora of rats in WKY, SHR, and SHR + Captopril groups, where genus was used as the taxa.

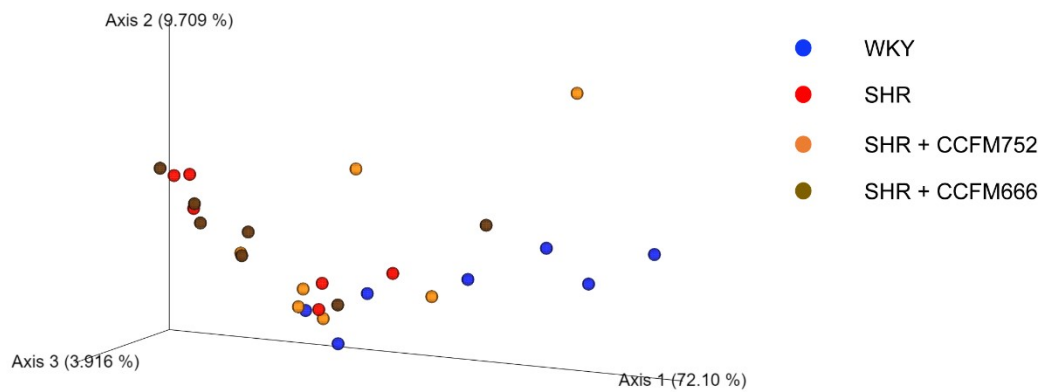

Fig. S5 Principal coordinate analysis of gut flora of rats in WKY, SHR, SHR + CCFM752, and SHR + CCFM666 groups, where genus was used as the taxa.
